# Supplementary material
Source: HighWire-hosted journal article supplement (https://bmjopen.bmj.com/content/15/4/e089693)

## Appendix

- Figure A1. Actual (solid line) and predicted (dashed line) five-year cost trajectories from group-based trajectory models with four to seven latent groups
- Table A1. Model fit statistics for group-based trajectory models with four to seven latent groups
- Table A2. Table A2. Average and predicted values (with 95 % confidence intervals) for the five-group trajectory model, by time period
- Figure A2. Mean trajectories for each latent group alongside individual trajectories (1% sample)
- Table A3. Parameters for five-group trajectory model
- Figure A3. Five-group trajectory model of HNHC patients based on alternative HNHC years (Sensitivity analysis 1)
- Figure A4. Five-group trajectory model of HNHC patients based on alternative HNHC thresholds (Sensitivity analysis 2)
- Table A4. Demographic and clinical characteristics by trajectory group
- Table A5. Factors associated with group membership (adjusted odds ratio and 95% confidence interval) from multivariate multinomial logistic regression
- Figure A5. Forest plot of factors associated with group membership, relative to the 'very-high-cost' trajectory group, from multinomial logistic regression (adjusted Odds Ratios, 95% CI)

**Figure A1. Actual (solid line) and predicted (dashed line) five-year cost trajectories from group-based trajectory models with four to seven latent groups**

*Four-group model*

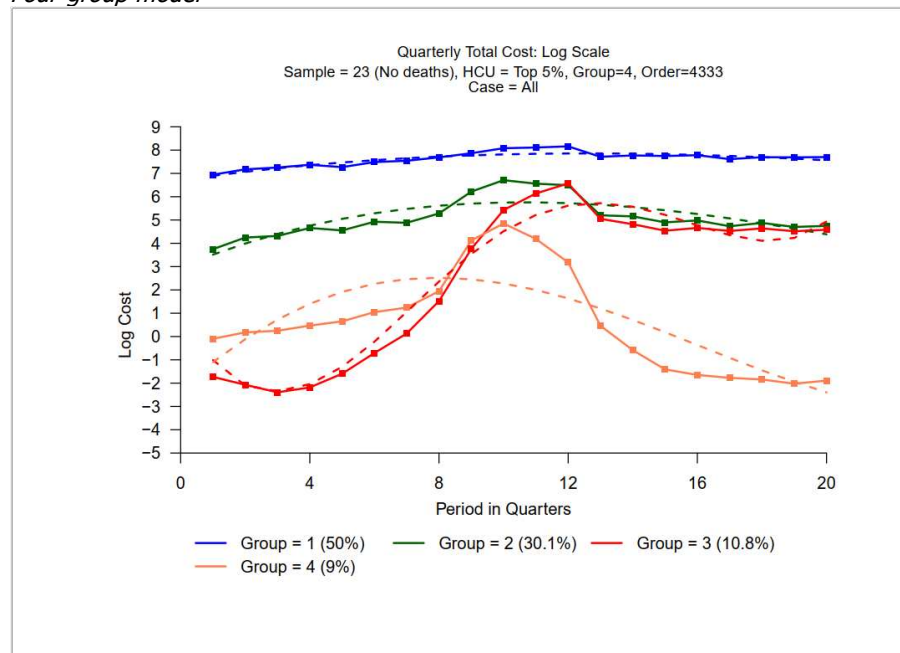

*Five-group model (base-case)*

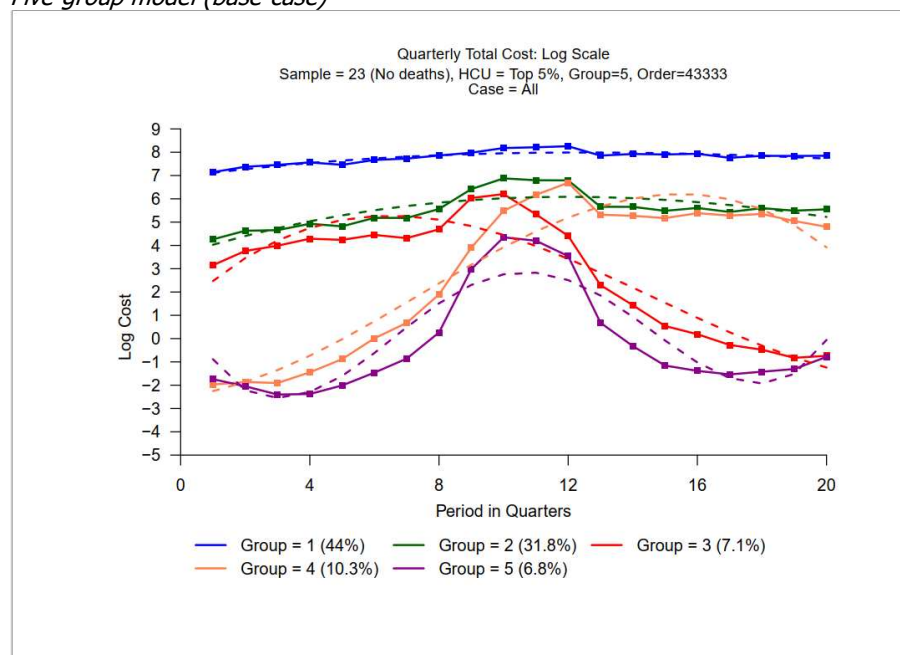

*Six-group model*

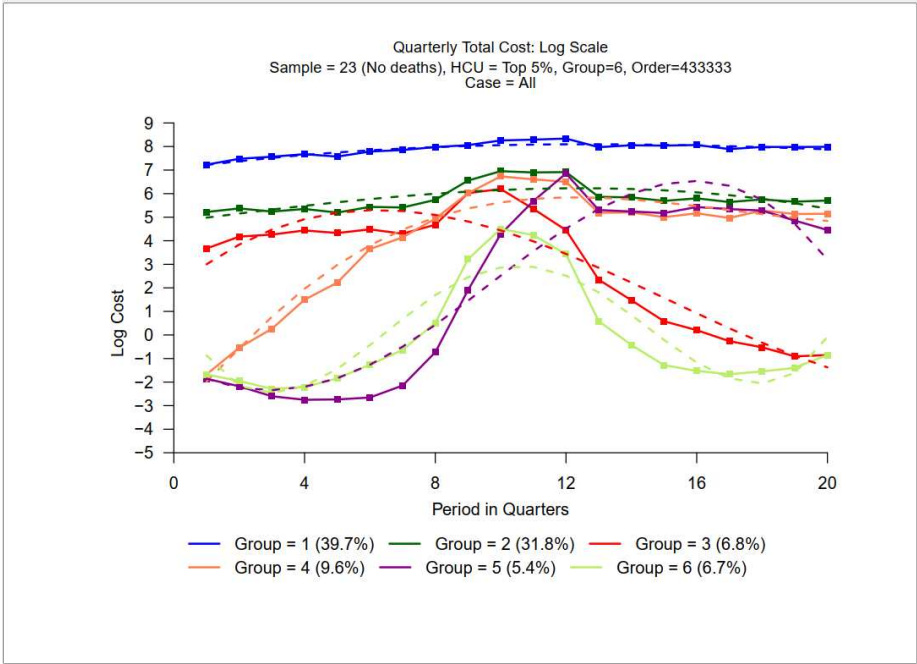

Seven-group model

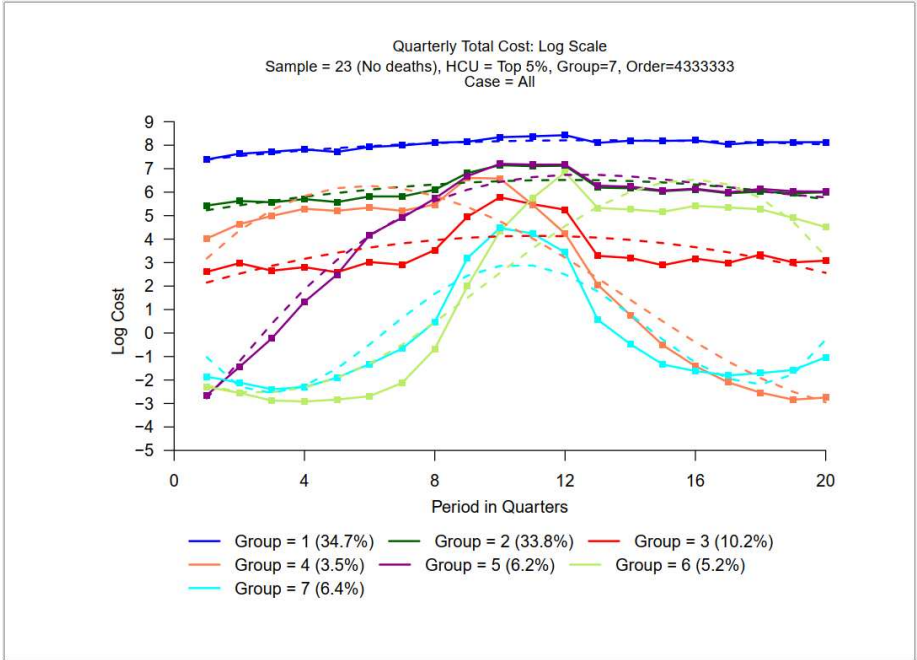

Table A1. Model fit statistics for group-based trajectory models with four to seven latent groups and 2<sup>nd</sup> to 4<sup>th</sup> degree polynomials\*

| groups | polynomials  | BIC1             | BIC2             | AIC              | LL               | Change in BIC1 | Change in BIC2 | Entropy      |
|--------|--------------|------------------|------------------|------------------|------------------|----------------|----------------|--------------|
| 4      | 4333         | -11550175        | -11550206        | -11550066        | -11550045        |                |                | 0.903        |
| 5      | <b>43333</b> | <b>-11472689</b> | <b>-11472728</b> | <b>-11472555</b> | <b>-11472529</b> | <b>23891</b>   | <b>23890</b>   | <b>0.898</b> |
| 6      | 433333       | -11433127        | -11433174        | -11432967        | -11432936        | 25155          | 25154          | 0.889        |
| 7      | 4333333      | -11401437        | -11401491        | -11401252        | -11401216        | 24975          | 24974          | 0.883        |

AIC: Akaike information criteria; BIC: Bayesian information criteria; LL: log-likelihood  
\* bolded model was selected as the base case

Table A2. Average and predicted values (with 95 % confidence intervals) for the five-group trajectory model, by time period

| Time period | Persistent very-high cost |       |      |       | Persistent high cost |       |      |       | Rising cost |       |       |       | Declining cost |       |       |       | Cost spike |       |       |       |
|-------------|---------------------------|-------|------|-------|----------------------|-------|------|-------|-------------|-------|-------|-------|----------------|-------|-------|-------|------------|-------|-------|-------|
|             | Avg.                      | Pred. | 2.5% | 97.5% | Avg.                 | Pred. | 2.5% | 97.5% | Avg.        | Pred. | 2.5%  | 97.5% | Avg.           | Pred. | 2.5%  | 97.5% | Avg.       | Pred. | 2.5%  | 97.5% |
| 1           | 7.14                      | 7.12  | 7.10 | 7.13  | 4.26                 | 4.03  | 4.00 | 4.05  | -1.97       | -2.25 | -2.29 | -2.21 | 3.15           | 2.47  | 2.42  | 2.52  | -1.74      | -0.89 | -0.95 | -0.82 |
| 2           | 7.38                      | 7.27  | 7.26 | 7.29  | 4.63                 | 4.40  | 4.38 | 4.43  | -1.87       | -1.86 | -1.90 | -1.83 | 3.76           | 3.46  | 3.42  | 3.49  | -2.05      | -2.22 | -2.25 | -2.18 |
| 3           | 7.46                      | 7.41  | 7.40 | 7.42  | 4.65                 | 4.74  | 4.72 | 4.76  | -1.91       | -1.35 | -1.38 | -1.32 | 3.99           | 4.21  | 4.18  | 4.24  | -2.40      | -2.55 | -2.58 | -2.52 |
| 4           | 7.56                      | 7.54  | 7.53 | 7.55  | 4.93                 | 5.03  | 5.02 | 5.05  | -1.45       | -0.74 | -0.77 | -0.70 | 4.29           | 4.75  | 4.72  | 4.78  | -2.38      | -2.29 | -2.33 | -2.26 |
| 5           | 7.46                      | 7.64  | 7.63 | 7.65  | 4.82                 | 5.29  | 5.28 | 5.31  | -0.88       | -0.03 | -0.06 | 0.00  | 4.24           | 5.09  | 5.07  | 5.12  | -2.01      | -1.61 | -1.64 | -1.57 |
| 6           | 7.67                      | 7.73  | 7.72 | 7.74  | 5.18                 | 5.51  | 5.49 | 5.52  | 0.01        | 0.74  | 0.71  | 0.77  | 4.45           | 5.25  | 5.23  | 5.28  | -1.46      | -0.62 | -0.65 | -0.58 |
| 7           | 7.73                      | 7.81  | 7.80 | 7.82  | 5.18                 | 5.69  | 5.68 | 5.70  | 0.67        | 1.55  | 1.53  | 1.58  | 4.31           | 5.25  | 5.23  | 5.28  | -0.86      | 0.49  | 0.46  | 0.52  |
| 8           | 7.86                      | 7.87  | 7.86 | 7.88  | 5.56                 | 5.84  | 5.82 | 5.85  | 1.90        | 2.37  | 2.35  | 2.39  | 4.69           | 5.10  | 5.08  | 5.13  | 0.26       | 1.51  | 1.49  | 1.54  |
| 9           | 7.98                      | 7.92  | 7.91 | 7.93  | 6.42                 | 5.95  | 5.93 | 5.96  | 3.90        | 3.17  | 3.15  | 3.19  | 6.03           | 4.83  | 4.81  | 4.85  | 2.98       | 2.30  | 2.28  | 2.33  |
| 10          | 8.18                      | 7.95  | 7.94 | 7.96  | 6.88                 | 6.03  | 6.01 | 6.04  | 5.48        | 3.92  | 3.90  | 3.94  | 6.20           | 4.45  | 4.43  | 4.47  | 4.35       | 2.76  | 2.73  | 2.78  |
| 11          | 8.21                      | 7.98  | 7.97 | 7.99  | 6.80                 | 6.07  | 6.06 | 6.08  | 6.17        | 4.60  | 4.59  | 4.62  | 5.34           | 3.97  | 3.95  | 4.00  | 4.20       | 2.83  | 2.80  | 2.85  |
| 12          | 8.26                      | 7.99  | 7.98 | 8.00  | 6.79                 | 6.09  | 6.07 | 6.10  | 6.69        | 5.20  | 5.18  | 5.21  | 4.41           | 3.43  | 3.40  | 3.45  | 3.54       | 2.51  | 2.49  | 2.54  |
| 13          | 7.86                      | 7.99  | 7.98 | 8.00  | 5.66                 | 6.07  | 6.06 | 6.08  | 5.32        | 5.67  | 5.65  | 5.69  | 2.30           | 2.83  | 2.80  | 2.85  | 0.68       | 1.85  | 1.82  | 1.88  |
| 14          | 7.92                      | 7.98  | 7.97 | 7.99  | 5.66                 | 6.03  | 6.01 | 6.04  | 5.27        | 6.01  | 5.99  | 6.03  | 1.44           | 2.19  | 2.16  | 2.22  | -0.32      | 0.94  | 0.91  | 0.97  |
| 15          | 7.90                      | 7.96  | 7.95 | 7.97  | 5.48                 | 5.96  | 5.94 | 5.97  | 5.17        | 6.19  | 6.17  | 6.21  | 0.54           | 1.54  | 1.50  | 1.57  | -1.16      | -0.08 | -0.12 | -0.05 |
| 16          | 7.93                      | 7.93  | 7.92 | 7.94  | 5.61                 | 5.86  | 5.84 | 5.87  | 5.38        | 6.19  | 6.17  | 6.21  | 0.19           | 0.89  | 0.86  | 0.93  | -1.38      | -1.02 | -1.06 | -0.98 |
| 17          | 7.76                      | 7.89  | 7.88 | 7.90  | 5.44                 | 5.73  | 5.72 | 5.75  | 5.28        | 5.98  | 5.96  | 6.00  | -0.27          | 0.27  | 0.23  | 0.31  | -1.54      | -1.69 | -1.73 | -1.65 |
| 18          | 7.85                      | 7.84  | 7.83 | 7.85  | 5.60                 | 5.59  | 5.57 | 5.60  | 5.35        | 5.55  | 5.53  | 5.57  | -0.48          | -0.30 | -0.35 | -0.26 | -1.42      | -1.93 | -1.96 | -1.89 |
| 19          | 7.84                      | 7.79  | 7.78 | 7.80  | 5.49                 | 5.42  | 5.40 | 5.43  | 5.05        | 4.87  | 4.84  | 4.90  | -0.82          | -0.81 | -0.87 | -0.76 | -1.31      | -1.52 | -1.56 | -1.48 |
| 20          | 7.85                      | 7.73  | 7.71 | 7.75  | 5.55                 | 5.22  | 5.20 | 5.25  | 4.80        | 3.92  | 3.88  | 3.95  | -0.74          | -1.24 | -1.31 | -1.17 | -0.79      | -0.06 | -0.12 | 0.00  |

**Figure A2. Mean trajectories for each latent group alongside individual trajectories (1% sample)**

**Group 1: Persistent very-high-cost**

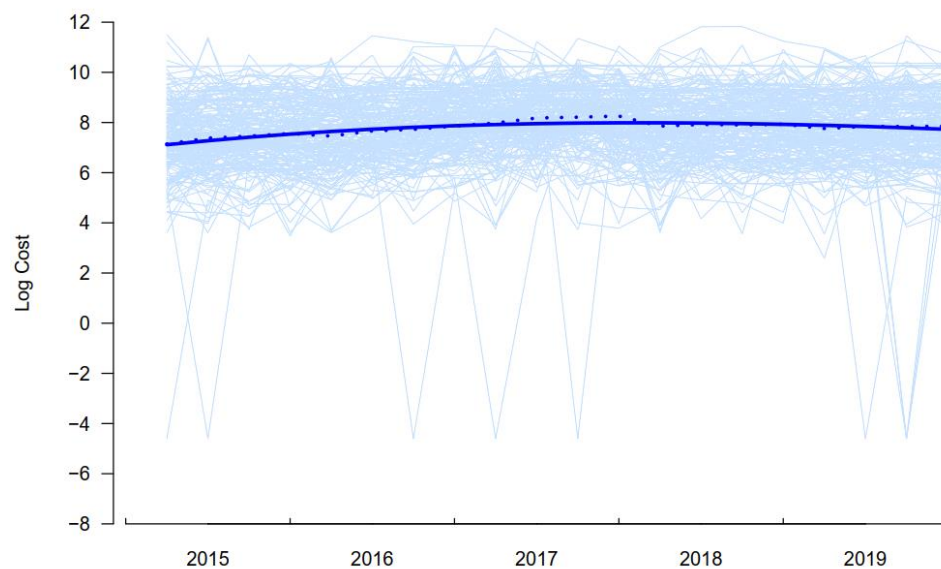

**Group 2: Persistent high-cost**

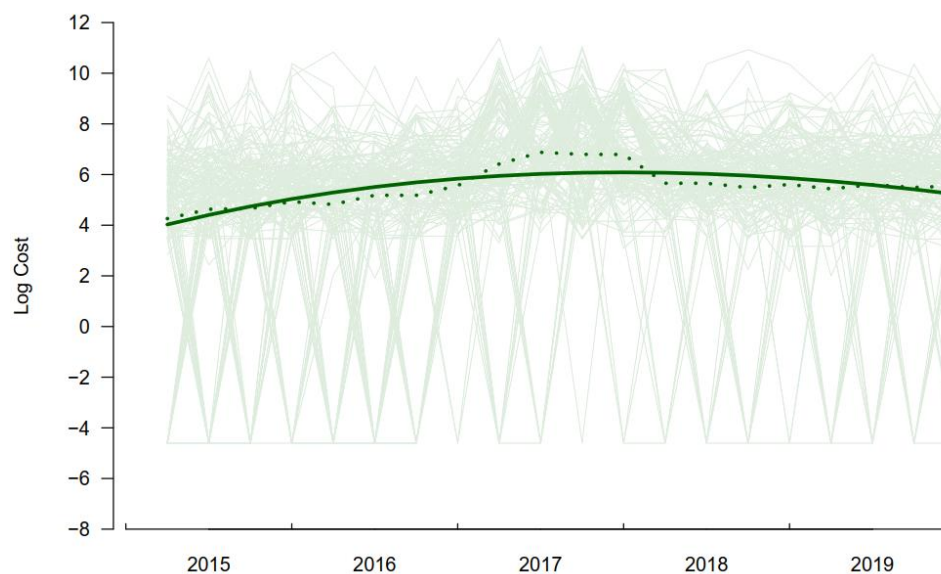

**Group 3: Rising cost**

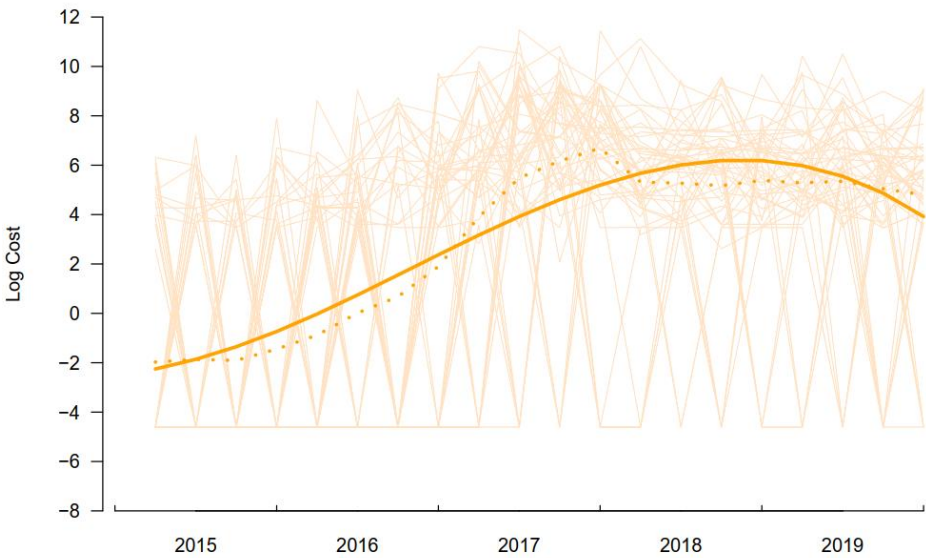

**Group 4: Declining cost**

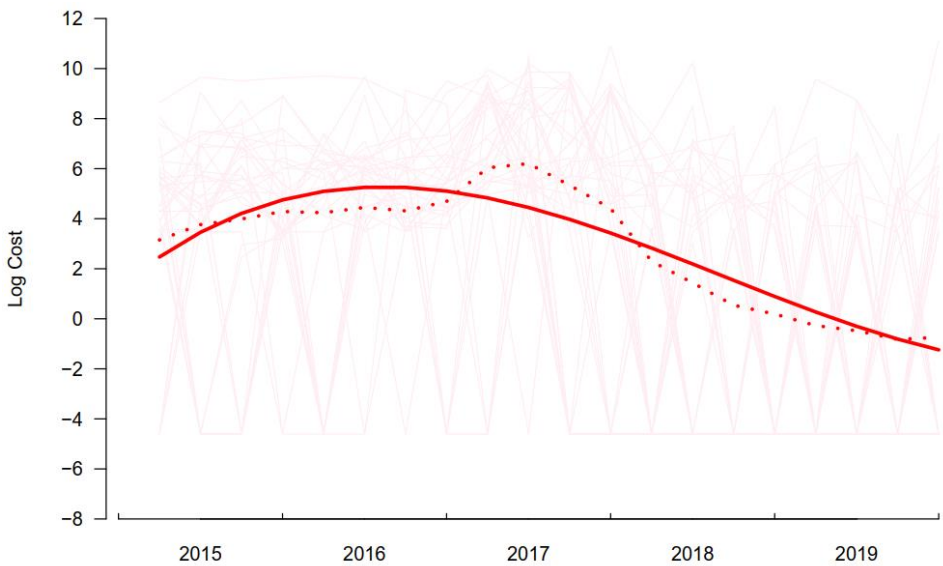

Group 5: Cost spike

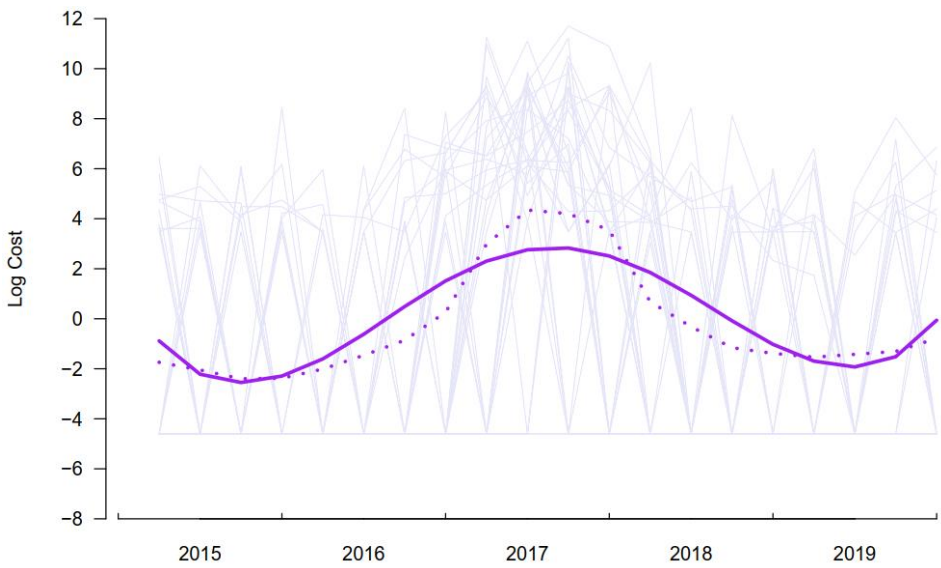



Table A3. Parameters for five-group trajectory model

| Group                     | Parameter | Estimate | SE     | t-value   | pvalue |
|---------------------------|-----------|----------|--------|-----------|--------|
| Cost spike                | Intercept | 2.1234   | 0.0414 | 51.2940   | 0.0000 |
| Cost spike                | Linear    | -4.0860  | 0.0258 | -158.1330 | 0.0000 |
| Cost spike                | Quadratic | 0.9875   | 0.0048 | 205.4800  | 0.0000 |
| Cost spike                | Cubic     | -0.0751  | 0.0003 | -221.7470 | 0.0000 |
| Cost spike                | Quartic   | 0.0018   | 0.0000 | 222.7400  | 0.0000 |
| Rising cost               | Intercept | -3.0978  | 0.0258 | -120.2160 | 0.0000 |
| Rising cost               | Linear    | 0.3070   | 0.0106 | 29.0050   | 0.0000 |
| Rising cost               | Quadratic | 0.0768   | 0.0012 | 65.9070   | 0.0000 |
| Rising cost               | Cubic     | -0.0037  | 0.0000 | -102.8930 | 0.0000 |
| Declining cost            | Intercept | 1.2173   | 0.0329 | 37.0040   | 0.0000 |
| Declining cost            | Linear    | 1.3766   | 0.0129 | 106.9220  | 0.0000 |
| Declining cost            | Quadratic | -0.1352  | 0.0014 | -94.6240  | 0.0000 |
| Declining cost            | Cubic     | 0.0030   | 0.0000 | 66.4530   | 0.0000 |
| Persistent high-cost      | Intercept | 3.6075   | 0.0166 | 216.9270  | 0.0000 |
| Persistent high-cost      | Linear    | 0.4412   | 0.0055 | 80.1070   | 0.0000 |
| Persistent high-cost      | Quadratic | -0.0218  | 0.0006 | -36.9620  | 0.0000 |
| Persistent high-cost      | Cubic     | 0.0002   | 0.0000 | 10.2930   | 0.0000 |
| Persistent very-high-cost | Intercept | 6.9499   | 0.0112 | 620.3540  | 0.0000 |
| Persistent very-high-cost | Linear    | 0.1873   | 0.0042 | 44.0910   | 0.0000 |
| Persistent very-high-cost | Quadratic | -0.0095  | 0.0005 | -20.5020  | 0.0000 |
| Persistent very-high-cost | Cubic     | 0.0001   | 0.0000 | 7.3060    | 0.0000 |

**Figure A3. Five-group trajectory model of HNHC patients based on alternative HNHC years (Sensitivity analysis 1)**

*HNHC year: 2016 (base case: 2017)*

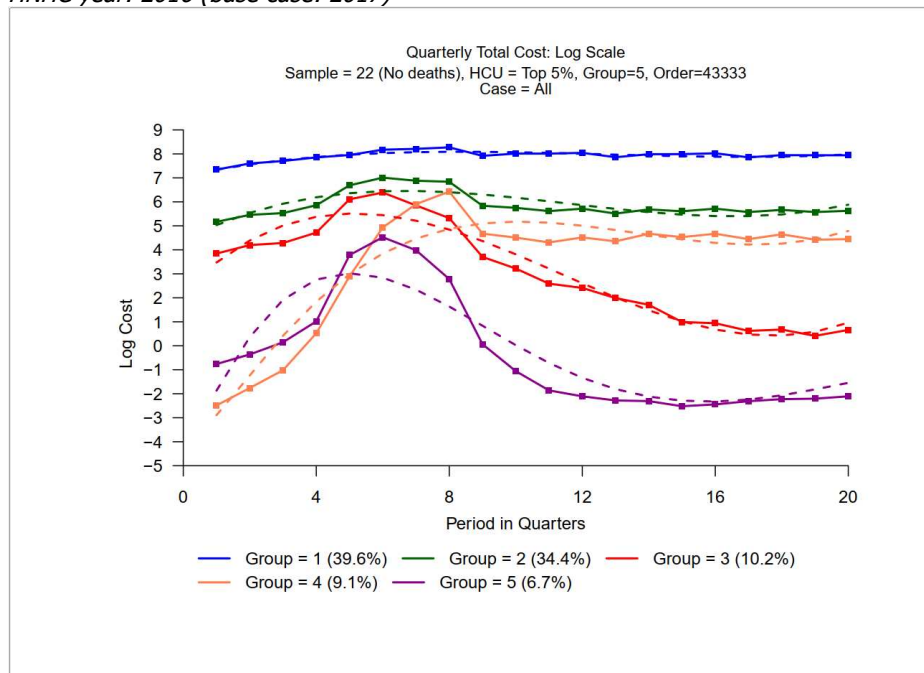

*HNHC year: 2018 (base case: 2017)*

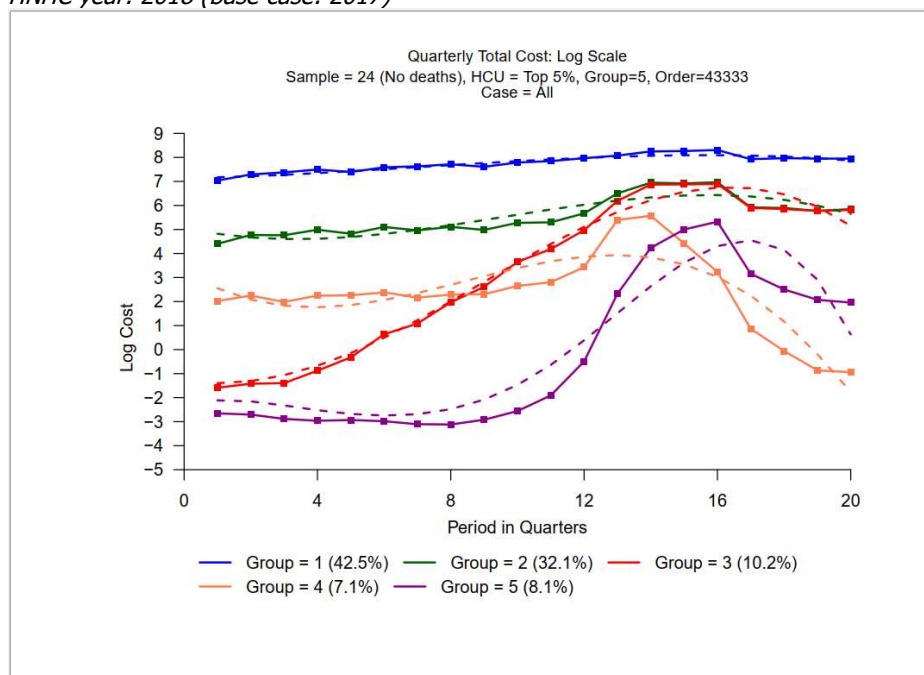

**Figure A4. Five-group trajectory model of HNHC patients based on alternative HNHC thresholds (Sensitivity analysis 2)**

*HNHC threshold: Top 1% (base case: 5%)*

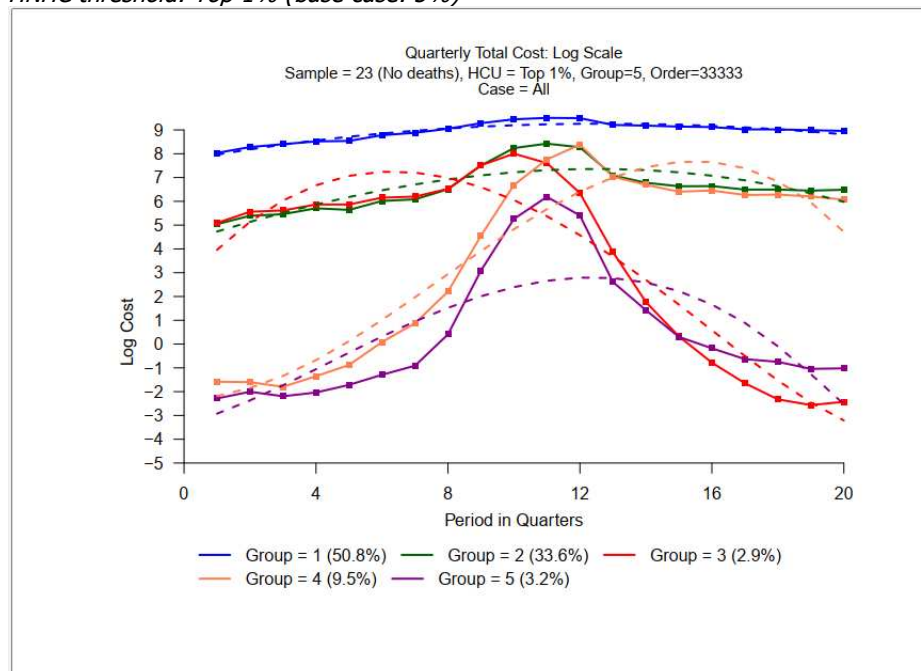

*HNHC threshold: Top 10% (base case: 5%)*

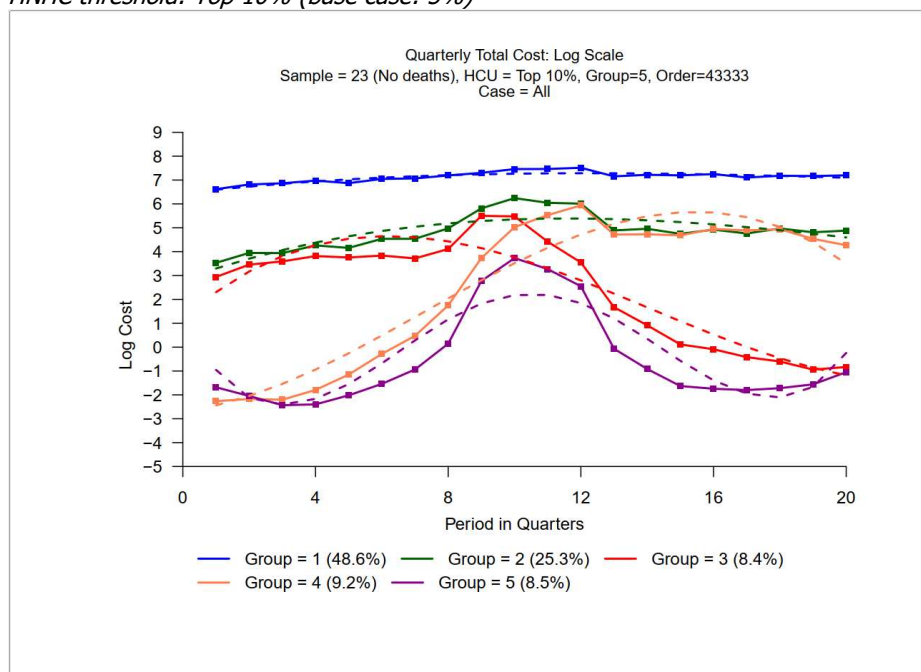

Table A4. Demographic and clinical characteristics (proportion) by trajectory group

|                                      | Persistently<br>very-high-cost | Persistently<br>high-cost | Rising cost | Declining<br>cost | Cost spike |
|--------------------------------------|--------------------------------|---------------------------|-------------|-------------------|------------|
|                                      |                                |                           |             |                   |            |
| Age Group                            |                                |                           |             |                   |            |
| 0-44                                 | 20.0%                          | 26.0%                     | 44.0%       | 53.0%             | 65.0%      |
| 45-64                                | 31.0%                          | 34.0%                     | 36.0%       | 28.0%             | 26.0%      |
| 65-74                                | 20.0%                          | 24.0%                     | 14.0%       | 11.0%             | 6.0%       |
| ≥75                                  | 30.0%                          | 16.0%                     | 6.2%        | 7.8%              | 2.1%       |
| Sex                                  |                                |                           |             |                   |            |
| Male                                 | 44.0%                          | 44.0%                     | 51.0%       | 38.0%             | 48.0%      |
| Female                               | 56.0%                          | 56.0%                     | 49.0%       | 62.0%             | 52.0%      |
| Income Quintile                      |                                |                           |             |                   |            |
| 1st                                  | 28.0%                          | 20.0%                     | 17.0%       | 21.0%             | 17.0%      |
| 2nd                                  | 21.0%                          | 19.0%                     | 16.0%       | 20.0%             | 17.0%      |
| 3rd                                  | 19.0%                          | 19.0%                     | 16.0%       | 19.0%             | 16.0%      |
| 4th                                  | 17.0%                          | 20.0%                     | 16.0%       | 19.0%             | 16.0%      |
| 5th                                  | 14.0%                          | 19.0%                     | 15.0%       | 17.0%             | 15.0%      |
| Missing                              | 1.5%                           | 2.4%                      | 21.0%       | 3.4%              | 19.3%      |
| Geographic Region                    |                                |                           |             |                   |            |
| Metropolitan                         | 56.0%                          | 52.0%                     | 43.0%       | 51.0%             | 42.0%      |
| Non-metropolitan (hub hospital)      | 37.0%                          | 38.0%                     | 30.0%       | 37.0%             | 30.0%      |
| Non-metropolitan (small/no hospital) | 6.5%                           | 7.8%                      | 7.2%        | 8.7%              | 8.4%       |
| Remote                               | 0.2%                           | 0.5%                      | 0.5%        | 0.6%              | 0.8%       |
| Missing                              | 0.4%                           | 1.3%                      | 20.0%       | 2.1%              | 18.0%      |
| Comorbidities (Elixhauser)           |                                |                           |             |                   |            |
| 0                                    | 27.0%                          | 40.0%                     | 42.0%       | 61.0%             | 68.0%      |
| 1                                    | 19.0%                          | 28.0%                     | 28.0%       | 20.0%             | 20.0%      |
| 2                                    | 17.0%                          | 16.0%                     | 16.0%       | 9.4%              | 7.9%       |
| 3                                    | 13.0%                          | 8.1%                      | 7.6%        | 4.7%              | 2.8%       |
| ≥4                                   | 24.0%                          | 6.8%                      | 6.8%        | 5.0%              | 1.6%       |

**Table A5. Factors associated with group membership (adjusted odds ratio and 95% confidence interval) from multivariate multinomial logistic regression**

|                                     | Persistently very-high-cost | Persistently high-cost | Rising cost        | Declining cost     | Cost spike         |
|-------------------------------------|-----------------------------|------------------------|--------------------|--------------------|--------------------|
| Age (per 10 years)                  | Ref                         | 0.87 (0.87, 0.88)*     | 0.69 (0.68, 0.69)* | 0.69 (0.68, 0.70)* | 0.59 (0.58, 0.60)* |
| Male (ref: female)                  |                             | 1.10 (1.08, 1.13)*     | 1.70 (1.64, 1.76)* | 1.07 (1.03, 1.11)* | 1.89 (1.81, 1.97)* |
| Rural region (ref: metropolitan)    |                             | 1.16 (1.13, 1.18)*     | 1.16 (1.13, 1.20)* | 1.23 (1.18, 1.27)* | 1.28 (1.23, 1.34)* |
| Lowest neighborhood income quintile |                             | 0.72 (0.70, 0.74)*     | 0.78 (0.75, 0.81)* | 0.78 (0.75, 0.81)* | 0.77 (0.74, 0.81)* |
| Comorbidities (count; ref=0)        |                             |                        |                    |                    |                    |
| One                                 |                             | 1.34 (1.29, 1.39)*     | 1.37 (1.29, 1.46)* | 0.63 (0.59, 0.68)* | 0.66 (0.59, 0.74)* |
| Two                                 |                             | 1.18 (1.11, 1.24)*     | 1.09 (0.99, 1.21)  | 0.40 (0.36, 0.45)* | 0.36 (0.30, 0.45)* |
| Three                               |                             | 0.97 (0.90, 1.04)      | 0.84 (0.73, 0.97)* | 0.29 (0.25, 0.34)* | 0.20 (0.15, 0.27)* |
| Four                                |                             | 0.69 (0.62, 0.77)*     | 0.59 (0.48, 0.72)* | 0.22 (0.17, 0.28)* | 0.12 (0.07, 0.19)* |
| Comorbidities                       |                             |                        |                    |                    |                    |
| Congestive Heart Failure            |                             | 0.83 (0.79, 0.88)*     | 1.30 (1.19, 1.43)* | 1.01 (0.89, 1.14)  | 1.05 (0.85, 1.28)  |
| Chronic Pulmonary Disease           |                             | 0.51 (0.48, 0.53)*     | 0.41 (0.37, 0.45)* | 0.67 (0.60, 0.75)* | 0.36 (0.30, 0.44)* |
| Diabetes                            |                             | 0.65 (0.63, 0.68)*     | 0.40 (0.37, 0.43)* | 0.56 (0.51, 0.62)* | 0.31 (0.26, 0.36)* |
| Hypothyroidism                      |                             | 0.89 (0.79, 1.01)      | 0.89 (0.71, 1.12)  | 1.28 (1.00, 1.62)* | 0.84 (0.54, 1.28)  |
| Renal Failure                       |                             | 0.49 (0.46, 0.51)*     | 0.40 (0.36, 0.45)* | 0.62 (0.55, 0.70)* | 0.27 (0.21, 0.36)* |
| Liver Disease                       |                             | 0.77 (0.71, 0.84)*     | 1.03 (0.92, 1.17)  | 0.93 (0.80, 1.08)  | 0.98 (0.80, 1.21)  |
| Peptic Ulcer Disease                |                             | 0.87 (0.79, 0.96)*     | 0.80 (0.68, 0.96)* | 0.89 (0.71, 1.10)  | 0.78 (0.56, 1.07)  |
| AIDS/HIV                            |                             | 0.63 (0.48, 0.84)*     | 0.43 (0.26, 0.71)* | 0.55 (0.30, 1.01)  | 0.38 (0.15, 0.98)* |
| Lymphoma                            |                             | 1.29 (1.14, 1.46)*     | 1.54 (1.28, 1.87)* | 1.00 (0.74, 1.35)  | 0.77 (0.51, 1.18)  |
| Metastatic Cancer                   |                             | 1.13 (1.04, 1.22)*     | 1.57 (1.40, 1.76)* | 1.36 (1.15, 1.61)* | 1.35 (1.07, 1.70)* |
| Cardiac Arrhythmia                  |                             | 1.01 (0.97, 1.05)      | 1.00 (0.93, 1.08)  | 1.23 (1.12, 1.34)* | 1.05 (0.91, 1.22)  |
| Solid Tumor without Metastasis      |                             | 1.47 (1.40, 1.53)*     | 2.12 (1.96, 2.28)* | 1.42 (1.28, 1.57)* | 1.72 (1.48, 1.98)* |
| Rheumatoid Arthritis                |                             | 0.30 (0.27, 0.33)*     | 0.19 (0.15, 0.24)* | 0.32 (0.25, 0.41)* | 0.14 (0.09, 0.21)* |

|                                 |  |                    |                    |                    |                    |
|---------------------------------|--|--------------------|--------------------|--------------------|--------------------|
| Coagulopathy                    |  | 0.80 (0.73, 0.88)* | 0.87 (0.75, 1.01)  | 1.14 (0.96, 1.36)  | 0.99 (0.77, 1.28)  |
| Obesity                         |  | 1.03 (0.94, 1.12)  | 0.61 (0.51, 0.72)* | 1.67 (1.45, 1.93)* | 0.93 (0.74, 1.17)  |
| Weight Loss                     |  | 0.62 (0.57, 0.67)* | 0.80 (0.69, 0.92)* | 0.85 (0.72, 1.02)  | 0.86 (0.67, 1.11)  |
| Fluid/Electrolyte Disorders     |  | 0.72 (0.69, 0.75)* | 0.78 (0.72, 0.84)* | 0.94 (0.86, 1.03)  | 0.96 (0.83, 1.11)  |
| Blood Loss Anemia               |  | 0.82 (0.72, 0.93)* | 1.01 (0.81, 1.24)  | 1.05 (0.81, 1.37)  | 1.41 (1.00, 1.98)* |
| Deficiency Anemia               |  | 0.79 (0.74, 0.84)* | 0.81 (0.72, 0.92)* | 0.97 (0.84, 1.11)  | 0.86 (0.70, 1.06)  |
| Alcohol Abuse                   |  | 1.47 (1.39, 1.56)* | 1.69 (1.54, 1.84)* | 2.21 (1.99, 2.45)* | 2.49 (2.16, 2.88)* |
| Drug Abuse                      |  | 0.47 (0.44, 0.49)* | 0.48 (0.44, 0.52)* | 0.69 (0.63, 0.76)* | 0.49 (0.43, 0.57)* |
| Valvular Disease                |  | 1.16 (1.08, 1.25)* | 1.11 (0.97, 1.26)  | 1.14 (0.96, 1.35)  | 1.11 (0.84, 1.46)  |
| Mental                          |  | 0.47 (0.45, 0.49)* | 0.57 (0.53, 0.61)* | 0.54 (0.49, 0.59)* | 0.54 (0.47, 0.61)* |
| Pulmonary Circulation Disorders |  | 0.89 (0.82, 0.96)* | 1.23 (1.08, 1.39)* | 0.94 (0.79, 1.12)  | 1.26 (1.00, 1.58)* |
| Hypertension                    |  | 1.15 (1.11, 1.20)* | 1.36 (1.27, 1.46)* | 1.23 (1.12, 1.34)* | 1.27 (1.11, 1.47)* |
| Paralysis                       |  | 0.82 (0.75, 0.89)* | 1.58 (1.40, 1.79)* | 0.98 (0.81, 1.19)  | 0.94 (0.72, 1.24)  |
| Other Neurological Disorders    |  | 0.49 (0.46, 0.52)* | 0.51 (0.46, 0.56)* | 0.55 (0.49, 0.63)* | 0.31 (0.25, 0.37)* |

**Figure A5. Forest plot of factors associated with group membership, relative to the 'very-high-cost' trajectory group, from multinomial logistic regression with *forward variable selection* (adjusted Odds Ratios, 95% CI)**

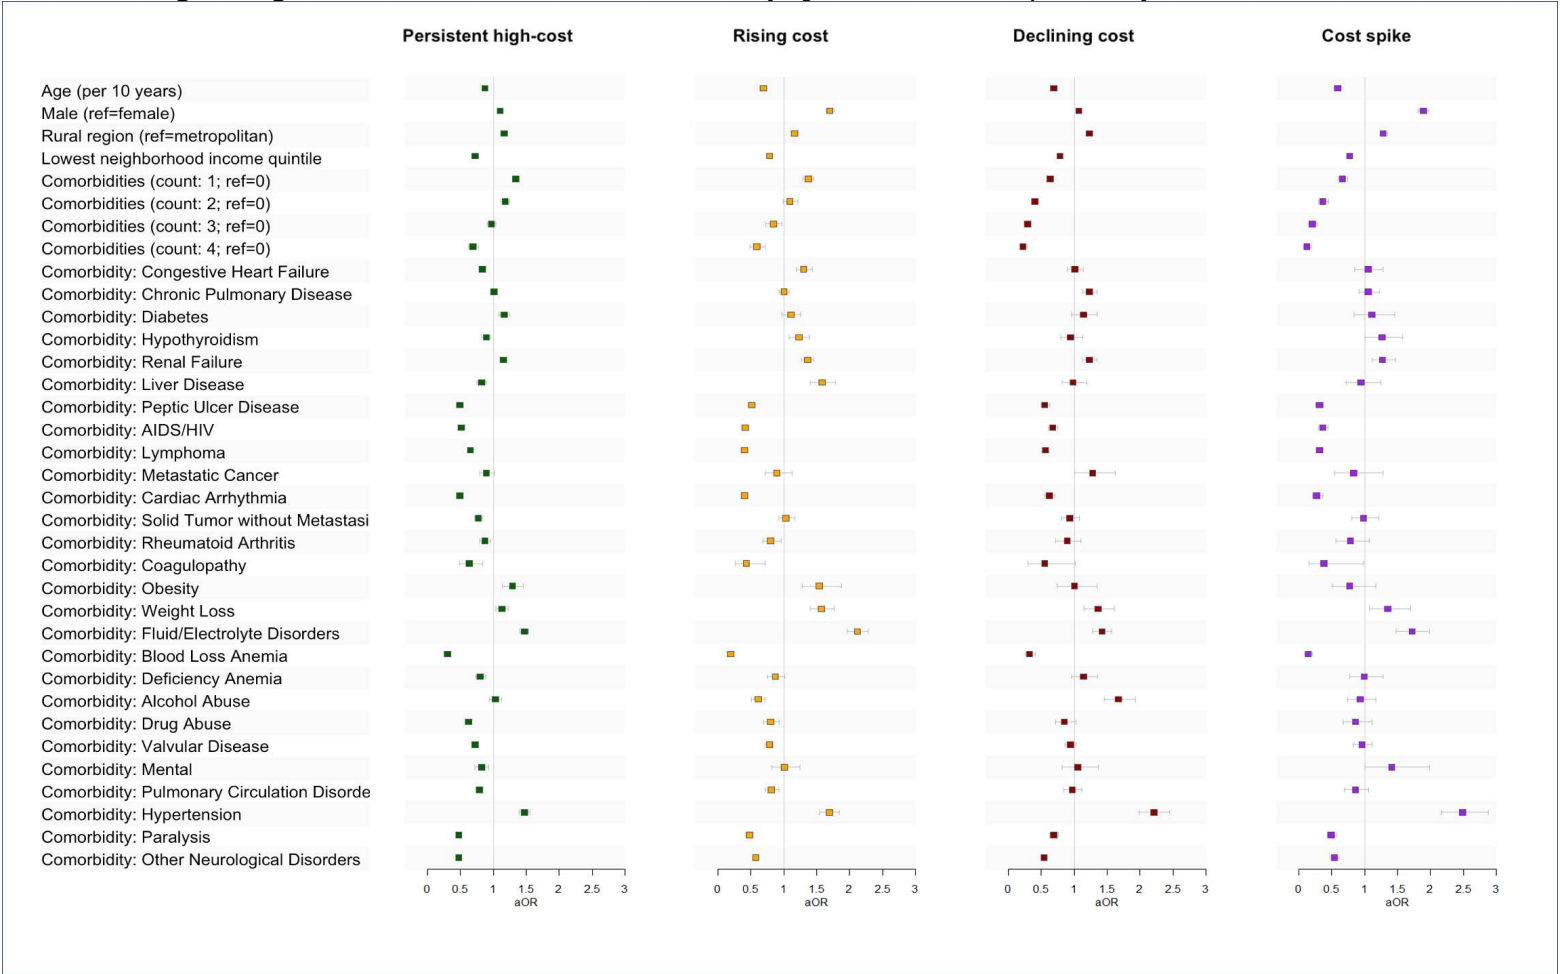

Supplement: inline-supplementary-material-1 [file inline-supplementary-material-1.pdf]
